# Supplementary material for: Miniaturisation of a laser-scribed graphene electrode enables analyte detection at ultra-low concentrations
Source: Royal Society of Chemistry journal article supplement (doi:10.1039/d6ra01797e), 2026-04-21
Supplement: d6ra01797e1.pdf [file d6ra01797e1.pdf]

## Supporting information

### Miniaturisation of laser-scribed graphene electrode enables analyte detection at ultra-low concentrations

Sarojini Prusty, Shubham B. Upadhye, Pranati Nayak<sup>\*a</sup>

<sup>a</sup>*Department of Engineering and Materials Physics, Institute of Chemical Technology-Indian Oil Odisha Campus, Bhubaneswar 751013, India.*

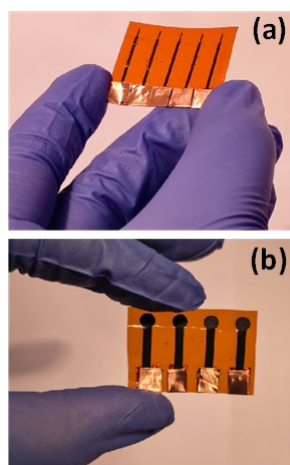

Fig. S1. Digital photograph of (a) LSG mE and (b) LSG ME arrays.

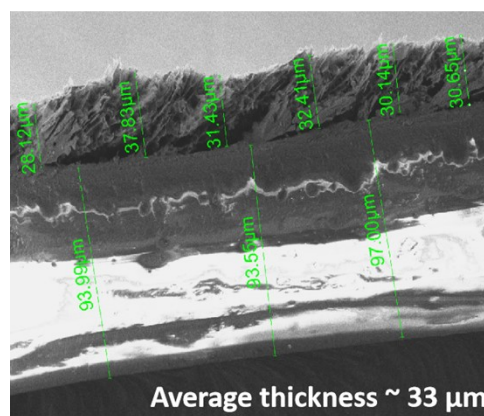

Fig. S2. Cross-sectional FESEM image of LSG electrode

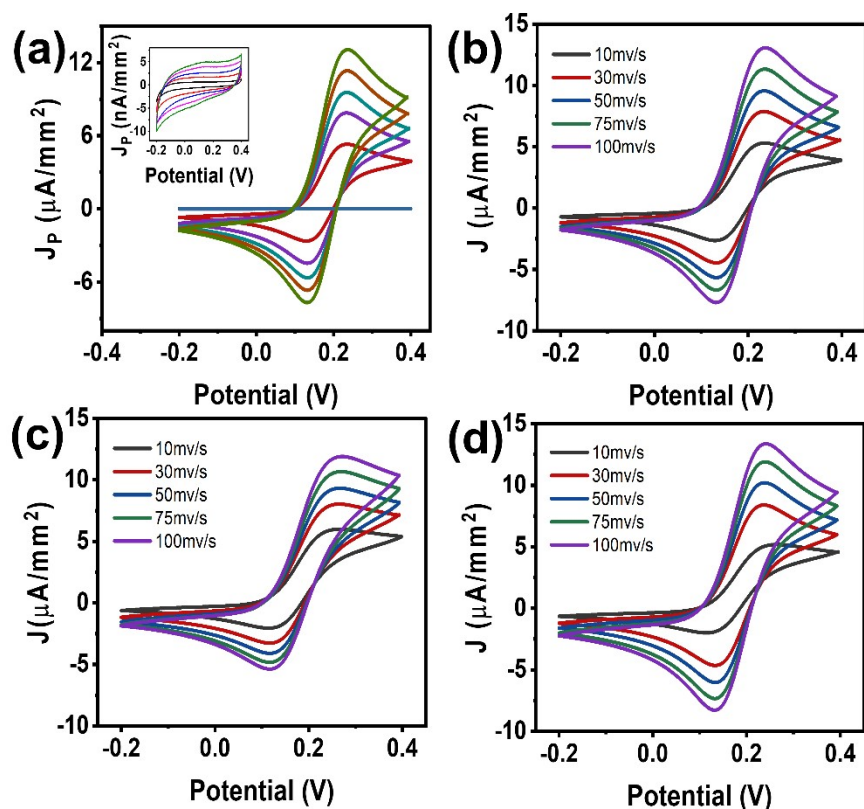

**Fig. S3.** Comparison CV plot of four different LSG mEs at 5mM  $[(\text{Fe}(\text{CN})_6)]^{3-/4-}$  in 0.1M KCl solution at varying scan rates starting from 10 mV/s to 100 mV/s. Inset in a show the CV response for only 0.1 M KCl solution. Inset of (a) shows plot of measured CV of LSG mEs at five different scan rates in 0.1M KCl solution.

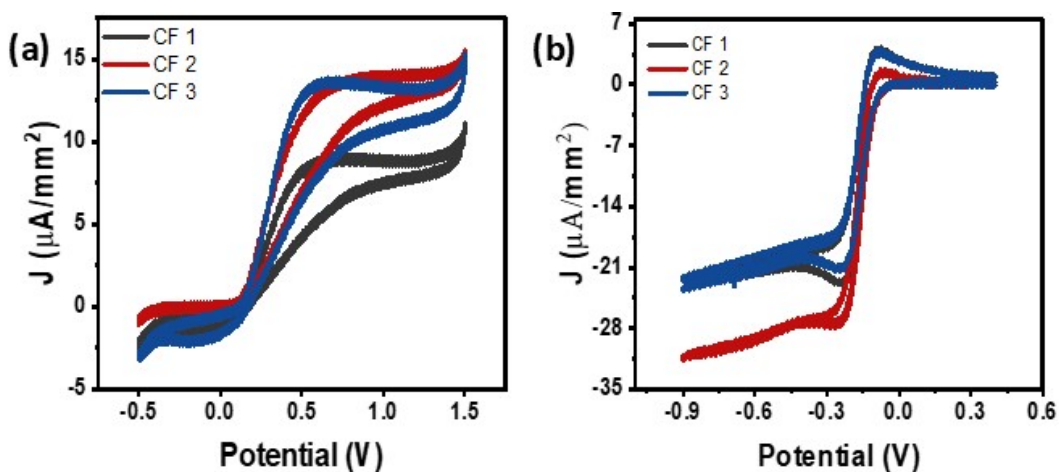

**Fig. S4.** Stability of 3 different CF  $\mu\text{Es}$  in 5mM  $[(\text{Fe}(\text{CN})_6)]^{3-/4-}$  and 5mM  $[(\text{Ru}(\text{NH}_3)_6)]^{3+/2+}$  with 5 mM KCl, Scan rate: 50 mV/s.

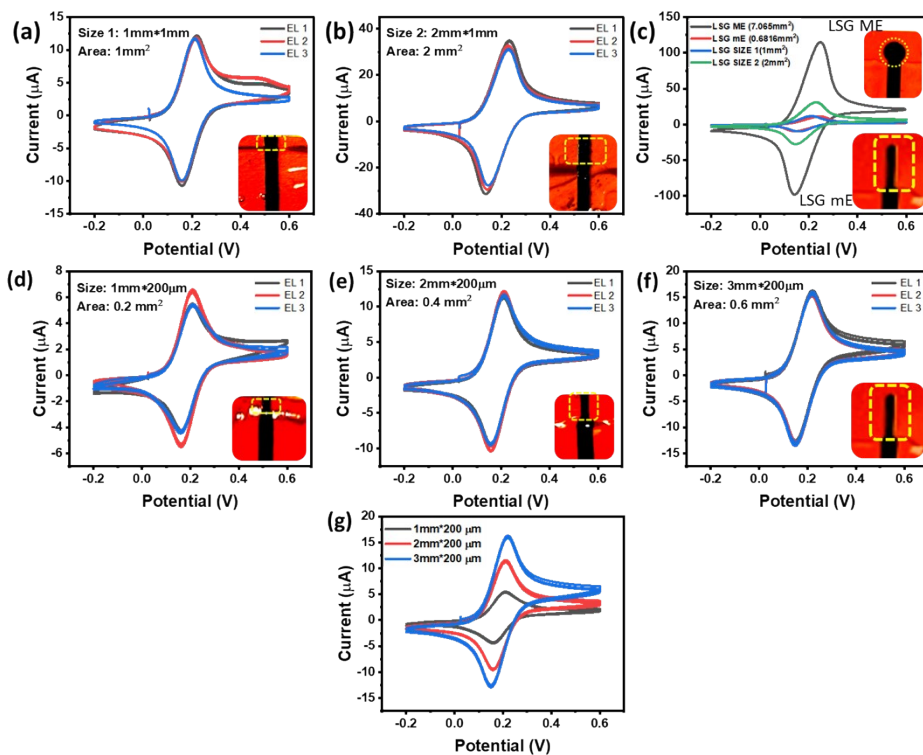

Fig. S5 CVs of LSG electrodes in 5 mM  $[\text{Fe}(\text{CN})_6]^{3-/4-}$  at  $50 \text{ mV s}^{-1}$ ; Electrodes of the same type with different area (a)  $1 \text{ mm}^2$ , (b)  $2 \text{ mm}^2$ , and (c) their comparison with LSG mE ( $\sim 0.6816 \text{ mm}^2$ ), LSG ME ( $\sim 7.065 \text{ mm}^2$ ). (d, e, and f) Electrodes of the same geometry with different sizes ( $0.2 \text{ mm}^2$ ,  $0.4 \text{ mm}^2$ ,  $0.6 \text{ mm}^2$ ), (g) Comparison plot of d-f.

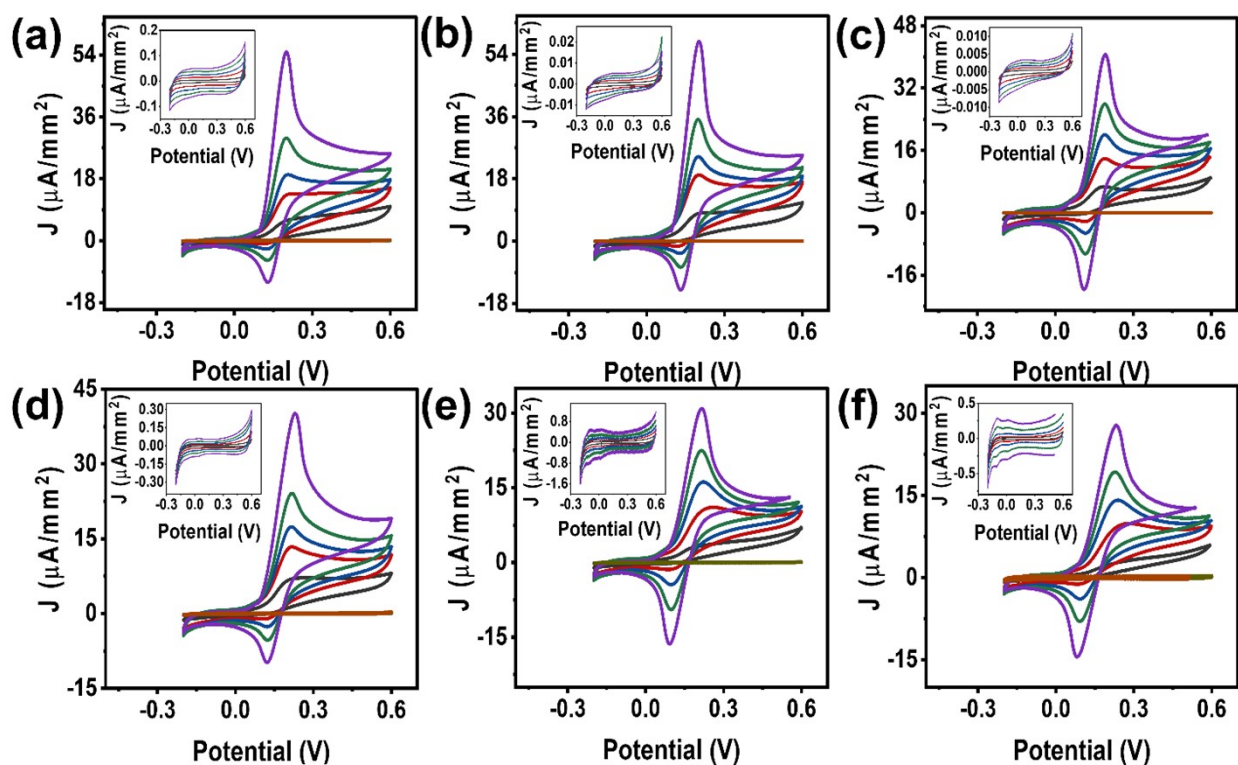

**Fig. S6.** Comparison CV plot of (a, b, c) 3 different LSG mEs and (d, e, f) 3 different LSG ME at different scan rate (10-100 mV/s) in 5 mM DA with 0.1 M PBS as supporting electrolyte. Insets show the plots of measured CV of LSG mEs at five different scan rate in only 0.1M PBS solution.

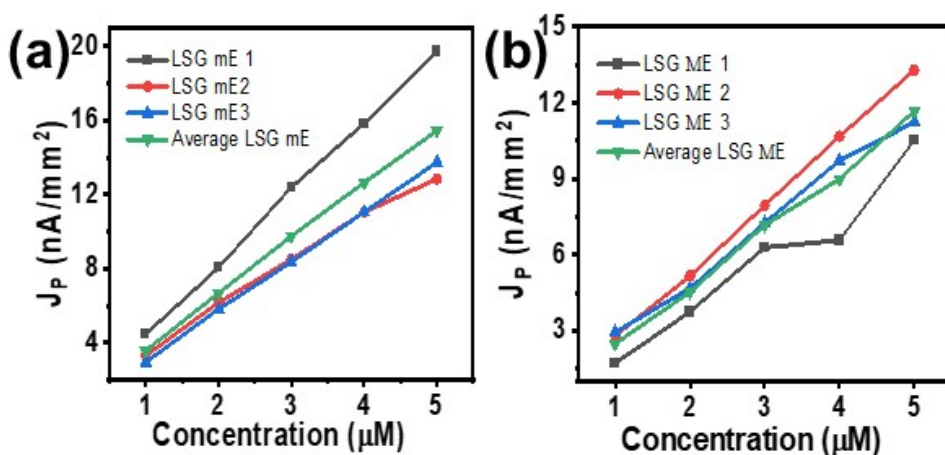

**Fig. S7** Linearity plot of three different (a) LSG mEs, and (b) LSG MEs for different concentrations of Dopamine.

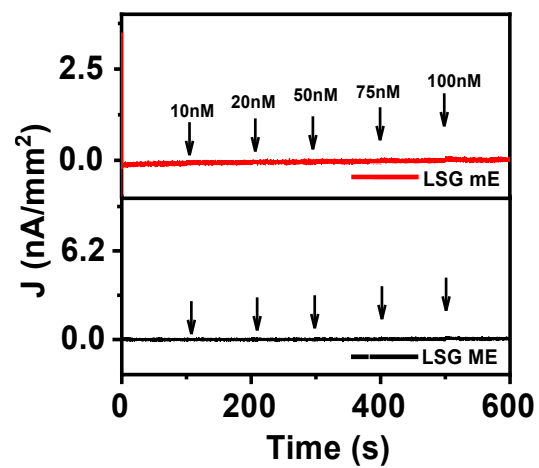

Fig. S8 Chronoamperogram for addition of ultra-low concentration of DA for LSG mE and LS
